# Supplementary material for: An automated reaction route mapping for the reaction of NO and active species on Ag4 clusters in zeolites
Source: Royal Society of Chemistry journal article supplement (doi:10.1039/d2cp04761f), 2023-01-01
Supplement: d2cp04761f2.pdf [file d2cp04761f2.pdf]

**An automated reaction route mapping for the reaction of NO and active species on Ag<sub>4</sub> cluster in zeolite**

Shunsaku Yasumura,<sup>†</sup> Taisetsu Kato,<sup>†</sup> Takashi Toyao,<sup>†</sup> Zen Maeno,<sup>‡</sup> Ken-ichi Shimizu<sup>\*,†</sup>

<sup>†</sup> Institute for Catalysis, Hokkaido University, N-21, W-10, Sapporo, 001-0021, Japan

<sup>‡</sup> School of Advanced Engineering, Kogakuin University, Tokyo, 192-0015, Japan

Table S1 convergence of cutoff energy for representative structures

|                                                                 | $E_{400\text{eV}}$ (eV) | $E_{500\text{eV}}$ (eV) | $E_{600\text{eV}}$ (eV) |
|-----------------------------------------------------------------|-------------------------|-------------------------|-------------------------|
| Ag <sub>4</sub> (H)(OOH)<br>(EQ5)                               | -888.2                  | -886.5                  | -886.8                  |
| Ag <sub>4</sub> + O <sub>2</sub> + H <sub>2</sub><br>(EQ48)     | -887.6                  | -885.9                  | -886.2                  |
| $\Delta E$ (EQ5–EQ48)                                           | -0.60                   | -0.58                   | -0.58                   |
| Ag <sub>4</sub> + 3H <sub>2</sub> + NO<br>(EQ4)                 | -904.3                  | -902.6                  | -903.0                  |
| Ag <sub>4</sub> (ONH <sub>2</sub> ) + 2H <sub>2</sub><br>(EQ99) | -905.6                  | -903.9                  | -904.3                  |
| $\Delta E$ (EQ4–EQ99)                                           | -1.3                    | -1.3                    | -1.3                    |

Table S2 convergence of k-point mesh for representative structures

|                                                                 | $E_{1\times 1\times 1}$ (eV) | $E_{2\times 2\times 2}$ (eV) | $E_{3\times 3\times 3}$ (eV) |
|-----------------------------------------------------------------|------------------------------|------------------------------|------------------------------|
| Ag <sub>4</sub> (H)(OOH)<br>(EQ5)                               | -888.2                       | -888.2                       | -888.2                       |
| Ag <sub>4</sub> + O <sub>2</sub> + H <sub>2</sub><br>(EQ48)     | -887.6                       | -887.6                       | -887.6                       |
| $\Delta E$ (EQ5–EQ48)                                           | -0.60                        | -0.60                        | -0.60                        |
| Ag <sub>4</sub> + 3H <sub>2</sub> + NO<br>(EQ4)                 | -904.3                       | -904.4                       | -904.4                       |
| Ag <sub>4</sub> (ONH <sub>2</sub> ) + 2H <sub>2</sub><br>(EQ99) | -905.6                       | -905.7                       | -905.7                       |
| $\Delta E$ (EQ4–EQ99)                                           | -1.3                         | -1.3                         | -1.3                         |

Table S3 Comparison before/after the optimization of lattice constants (their volumes were fixed)

|                                                                 | $a$ (Å) | $b$ (Å) | $c$ (Å) | $\alpha$ (°) | $\beta$ (°) | $\gamma$ (°) |
|-----------------------------------------------------------------|---------|---------|---------|--------------|-------------|--------------|
| Experiment                                                      | 13.675  | 13.675  | 14.767  | 90           | 90          | 120          |
| CHA (Si only)                                                   | 13.675  | 13.675  | 14.767  | 90           | 90          | 120          |
| Ag <sub>4</sub> (H)(OOH)<br>(EQ5)                               | 13.669  | 13.684  | 14.757  | 89.66        | 90.03       | 119.96       |
| Ag <sub>4</sub> + O <sub>2</sub> + H <sub>2</sub><br>(EQ48)     | 13.675  | 13.675  | 14.767  | 90           | 90          | 120          |
| Ag <sub>4</sub> + 3H <sub>2</sub> + NO<br>(EQ4)                 | 13.675  | 13.675  | 14.767  | 90           | 90          | 120          |
| Ag <sub>4</sub> (ONH <sub>2</sub> ) + 2H <sub>2</sub><br>(EQ99) | 13.675  | 13.675  | 14.767  | 90           | 90          | 120          |

(a)

Total of Ag<sub>4</sub> cluster: 1.47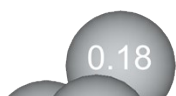

(b)

O: -0.36 (-0.48, before adsorption)<sup>S2</sup>

N: 0.39 (0.48, before adsorption)

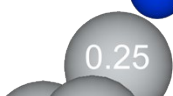

Figure S1 Bader charge analysis for Ag<sub>4</sub> cluster in CHA zeolite (a) before/ (b) after NO adsorption. Color codes: Si (yellow), Al (green), O (red), N (blue), and Ag (silver).
